# Supplementary material for: Los mieleros de Peñalver
Source: Royal Society of Chemistry journal article supplement (doi:10.1039/c4cp00526k), 2003-01-01
Supplement: c4cp00526k1.pdf [file c4cp00526k1.pdf]

## Supporting Information

### Atomic Partitioning of M-H<sub>2</sub> Bonds in [NiFe] Hydrogenase-

### A Test case of Concurrent Binding

*Swaminathan Angeline Vedha, Rajadurai Vijay Solomon, &*

*Ponnambalam Venuvanalingam*

Theoretical and Computational Chemistry Laboratory, School of Chemistry,

Bharathidasan University, Tiruchirappalli – 620024, Tamil Nadu, INDIA

Tel: +91 431 2407053, Fax: +91 431 2407045

E-mail: [venuvanalingam@yahoo.com](mailto:venuvanalingam@yahoo.com)

SIF1. Geometries of the twelve cases of the active site of the [NiFe] Hase in the as isolated Ni-SI state. Figure shows Ni in blue, Fe in purple, O in red, S in yellow, N in deep blue and C & H in ash colors.

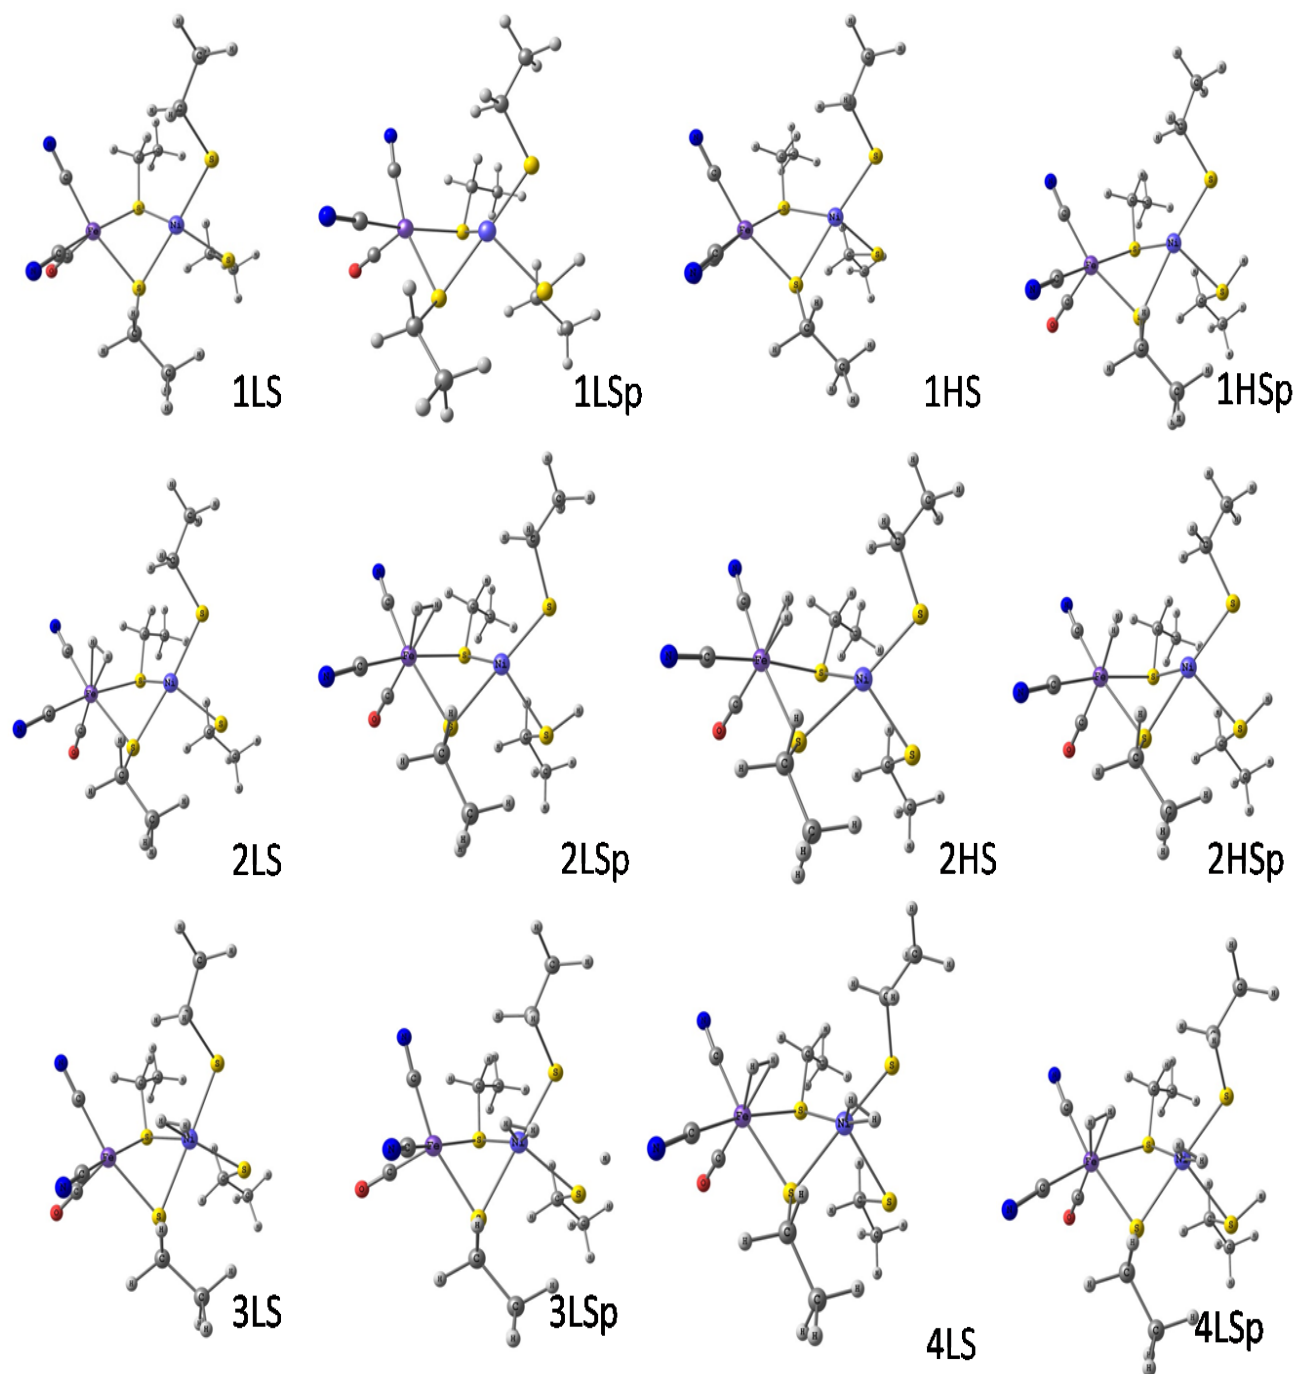

## Introduction to QTAIM

The Quantum theory of atoms in molecules (QTAIM) is mainly based on electron density  $\rho(r)$  and it provides useful insights on the nature of bonding and non-bonding interactions in a chemical system<sup>[88, 89]</sup>. According to Bader's (QTAIM theory, the presence of (3,-1) bond critical point (*bcp*) between any two atoms is accepted as a criterion for the existence of interactions between them<sup>[90, 91]</sup>. Further the topological properties at *bcp* namely, electron density  $\rho(r)$ , its second derivative  $\nabla^2\rho(r)$ , Kinetic energy density  $G(r)$  and the potential energy density  $V(r)$  and their signs describes the type and nature of a chemical bond. The molecular graph of the studied systems is given in figure below, where the big spheres correspond to attractors attributed to positions of atoms and critical points such as (3, -1) bond critical point (red) and (3, +1) ring critical point (yellow) & (3,+3) cage critical point (green) indicated by small spheres. The bond ellipticity ( $\epsilon$ ), which is defined as  $(\lambda_1/\lambda_2) - 1$ , where  $\lambda$  is the eigen value at the *bcp*, also provides quantitative evidence for the  $\pi$  character of the bond under investigation. When  $\epsilon \rightarrow 0$ , the bond belongs to a typical  $\sigma$  bond, and larger is the  $\epsilon$  value, stronger will be the  $\pi$  character.

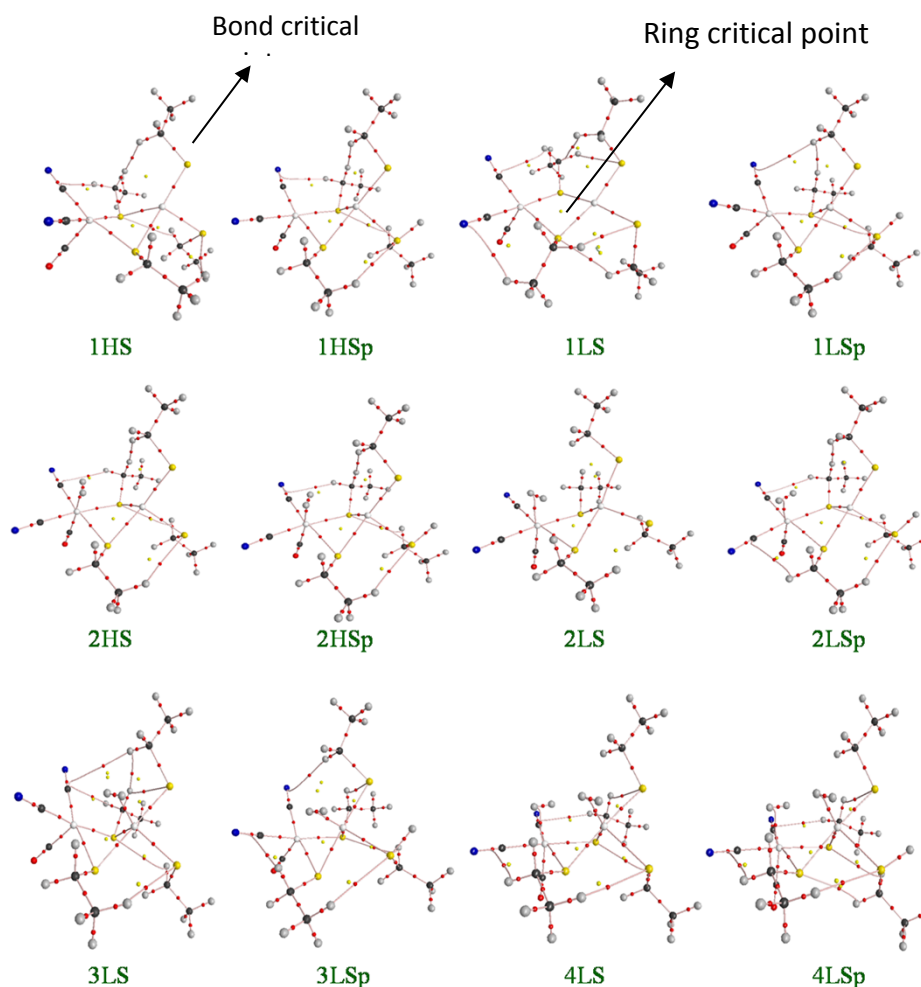

Table 1 Topological properties at the atomic basin of Ni. Computed at the B3LYP/6-311++G with (2d, 2p) polarizations on all atoms.

|      | <b>Volume @0.01a.u</b> | <b>Volume @ 0.001a.u</b> | <b><math>\rho(r)</math> (a.u)</b> | <b>Energy(a.u)</b> | <b>Charge (q in a.u)</b> |
|------|------------------------|--------------------------|-----------------------------------|--------------------|--------------------------|
| 1LS  | 1.0552e+002            | 9.4985e+001              | 2.7392e+001                       | -1.5090e+003       | 6.0796e-001              |
| 1LSp | 1.0778e+002            | 9.8667e+001              | 2.7459e+001                       | -1.5091e+003       | 5.4026e-001              |
| 1HS  | 1.0596e+002            | 9.5962e+001              | 2.7186e+001                       | -1.5088e+003       | 8.1340e-001              |
| 1HSp | 1.1181e+002            | 1.0136e+002              | 2.7241e+001                       | -1.5091e+003       | 7.5816e-001              |
| 2LS  | 1.0518e+002            | 9.8198e+001              | 2.7426e+001                       | -1.5091e+003       | 5.7344e-001              |
| 2LSp | 1.0772e+002            | 1.0057e+002              | 2.7263e+001                       | -1.5091e+003       | 7.3631e-001              |
| 2HS  | 1.0696e+002            | 9.9910e+001              | 2.7229e+001                       | -1.5091e+003       | 7.7043e-001              |
| 2HSp | 1.0531e+002            | 9.8477e+001              | 2.7228e+001                       | -1.5091e+003       | 7.7115e-001              |
| 3LS  | 8.9656e+001            | 8.7047e+001              | 2.7438e+001                       | -1.5090e+003       | 5.6176e-001              |
| 3LSp | 8.5336e+001            | 8.4547e+001              | 2.7463e+001                       | -1.5091e+003       | 5.3627e-001              |
| 4LS  | 8.6511e+001            | 8.5533e+001              | 2.7427e+001                       | -1.5090e+003       | 5.7239e-001              |
| 4LSp | 2.7427e+001            | 2.7425e+001              | 2.7427e+001                       | -1.5090e+003       | 5.7239e-001              |

Table 2 Topological properties at the atomic basin of Fe Computed at the B3LYP/6-311++G with (2d, 2p) polarizations on all atoms.

|      | <b>Volume@0.001 (a.u)</b> | <b>Volume@0.002 (a.u)</b> | <b>Energy(a.u)</b> | <b>Charge (q in a.u)</b> | <b><math>\rho(r)</math> (a.u)</b> |
|------|---------------------------|---------------------------|--------------------|--------------------------|-----------------------------------|
| 1LS  | 73.2358                   | 70.21                     | -1263.96           | 0.93                     | 25.0658                           |
| 1LSp | 73.2148                   | 71.20                     | -1264.17           | 0.90                     | 25.0946                           |
| 1HS  | 75.0600                   | 71.75                     | -1263.95           | 0.91                     | 25.0908                           |
| 1HSp | 75.2420                   | 72.13                     | -1264.11           | 0.92                     | 25.0792                           |
| 2LS  | 64.6405                   | 64.1825                   | -1264.129          | 0.909                    | 25.0907                           |
| 2LSp | 63.9115                   | 63.52                     | -1264.09           | 0.895                    | 25.1044                           |
| 2HS  | 64.3881                   | 63.97                     | -1264.08           | 0.901                    | 25.0985                           |
| 2HSp | 64.3881                   | 63.97                     | -1264.08           | 0.90                     | 25.0985                           |
| 3LS  | 70.3595                   | 69.48                     | -1264.14           | 0.89                     | 25.1063                           |
| 3LSp | 70.4586                   | 69.32                     | -1264.16           | 0.90                     | 25.1040                           |
| 4LS  | 64.2546                   | 63.78                     | -1264.08           | 0.91                     | 25.0929                           |
| 4LSp | 64.2985                   | 63.83                     | -1264.16           | 0.90                     | 25.0970                           |

Table 3. Results of the NBO analysis showing donor and acceptor orbitals with their corresponding interaction energies. In kcal/mol computed at the B3LYP/6-311++G (d, p) level

|     | <b>Donor NBO(i)</b>                        | <b>Acceptor NBO(j)</b>                       | $\Delta E_{i \rightarrow j}$ |
|-----|--------------------------------------------|----------------------------------------------|------------------------------|
| 1LS | $\sigma$ S <sub>3</sub> -Ni <sub>20</sub>  | $\sigma^*$ S <sub>12</sub> -Ni <sub>20</sub> | 6.41                         |
|     | $\sigma$ C <sub>4</sub> -H <sub>27</sub>   | $\sigma^*$ C <sub>5</sub> -S <sub>6</sub>    | 4.79                         |
|     | $\sigma$ C <sub>7</sub> -H <sub>23</sub>   | $\sigma^*$ C <sub>8</sub> -S <sub>9</sub>    | 4.69                         |
|     | $\sigma$ S <sub>9</sub> -Ni <sub>20</sub>  | $\sigma^*$ S <sub>6</sub> -Ni <sub>20</sub>  | 5.35                         |
|     | $\sigma$ C <sub>10</sub> -H <sub>30</sub>  | $\sigma^*$ C <sub>11</sub> -S <sub>12</sub>  | 4.94                         |
|     | $\sigma$ S <sub>12</sub> -Ni <sub>20</sub> | n*Fe <sub>13</sub>                           | 17.58                        |
|     | $\sigma$ S <sub>12</sub> -Ni <sub>20</sub> | $\sigma^*$ S <sub>3</sub> -Ni <sub>20</sub>  | 5.75                         |
|     | $\sigma$ Fe <sub>13</sub> -C <sub>14</sub> | $\sigma^*$ Fe <sub>13</sub> -C <sub>14</sub> | 10.05                        |
|     | $\sigma$ Fe <sub>13</sub> -C <sub>14</sub> | $\sigma^*$ Fe <sub>13</sub> -C <sub>18</sub> | 10.48                        |
|     | $\sigma$ Fe <sub>13</sub> -C <sub>16</sub> | $\sigma^*$ S <sub>12</sub> -Fe <sub>13</sub> | 7.31                         |
|     | $\sigma$ Fe <sub>13</sub> -C <sub>18</sub> | $\sigma^*$ Fe <sub>13</sub> -C <sub>18</sub> | 6.77                         |
|     | n S <sub>3</sub>                           | $\sigma^*$ S <sub>3</sub> -Ni <sub>20</sub>  | 4.7                          |
|     | n Fe <sub>13</sub>                         | $\sigma^*$ C <sub>18</sub> -O <sub>19</sub>  | 21.63                        |
|     | n Fe <sub>13</sub>                         | $\pi^*$ C <sub>18</sub> -O <sub>19</sub>     | 24.38                        |
|     | n Ni <sub>20</sub>                         | n*Fe <sub>13</sub>                           | 5.10                         |
|     | $\sigma$ S <sub>12</sub> -Ni <sub>20</sub> | n*Fe <sub>13</sub>                           | 17.58                        |
|     | $\sigma$ Fe <sub>13</sub> -C <sub>16</sub> | $\sigma^*$ Fe <sub>13</sub> -C <sub>16</sub> | 10.37                        |
|     | $\sigma$ Fe <sub>13</sub> -C <sub>16</sub> | $\sigma^*$ Fe <sub>13</sub> -C <sub>18</sub> | 11.18                        |
|     | $\sigma$ Fe <sub>13</sub> -C <sub>18</sub> | $\sigma^*$ Fe <sub>13</sub> -C <sub>14</sub> | 10.21                        |
|     | $\sigma$ Fe <sub>13</sub> -C <sub>18</sub> | $\sigma^*$ Fe <sub>13</sub> -C <sub>16</sub> | 10.68                        |
| 2LS | $\sigma$ S <sub>6</sub> -Ni <sub>20</sub>  | $\sigma^*$ S <sub>9</sub> -Ni <sub>20</sub>  | 6.88                         |
|     | $\sigma$ S <sub>12</sub> -Fe <sub>13</sub> | n*Ni <sub>20</sub>                           | 21.07                        |
|     | $\sigma$ Fe <sub>13</sub> -C <sub>14</sub> | $\sigma^*$ Fe <sub>13</sub> -C <sub>14</sub> | 11.68                        |
|     | $\sigma$ Fe <sub>13</sub> -C <sub>14</sub> | $\sigma^*$ Fe <sub>13</sub> -C <sub>18</sub> | 10.59                        |
|     | $\sigma$ Fe <sub>13</sub> -C <sub>18</sub> | $\sigma^*$ Fe <sub>13</sub> -C <sub>14</sub> | 10.71                        |
|     | $\sigma$ Fe <sub>13</sub> -C <sub>18</sub> | $\sigma^*$ Fe <sub>13</sub> -C <sub>16</sub> | 10.28                        |
|     | n Fe <sub>13</sub>                         | $\sigma^*$ C <sub>18</sub> -O <sub>19</sub>  | 19.20                        |
|     | n Fe <sub>13</sub>                         | $\sigma^*$ C <sub>18</sub> -O <sub>19</sub>  | 16.61                        |
|     | $\sigma$ Fe <sub>13</sub> -C <sub>14</sub> | $\sigma^*$ H <sub>41</sub> -H <sub>42</sub>  | 4.88                         |
|     | n S <sub>12</sub>                          | n*Ni <sub>20</sub>                           | 78.60                        |
|     | $\sigma$ S <sub>12</sub> -Fe <sub>13</sub> | n*Ni <sub>20</sub>                           | 21.07                        |
|     | n Fe <sub>13</sub>                         | $\sigma^*$ C <sub>18</sub> -O <sub>19</sub>  | 19.20                        |
|     | n Fe <sub>13</sub>                         | $\pi^*$ C <sub>18</sub> -O <sub>19</sub>     | 16.61                        |
|     | $\sigma$ Fe-C <sub>14</sub>                | $\sigma^*$ Fe <sub>13</sub> -C <sub>14</sub> | 11.68                        |
|     | n Fe                                       | $\sigma^*$ H <sub>41</sub> -H <sub>42</sub>  | 2.39                         |
| 3LS | $\sigma$ S <sub>3</sub> -Ni <sub>20</sub>  | $\sigma^*$ S <sub>12</sub> -Ni <sub>20</sub> | 5.20                         |
|     | $\sigma$ S <sub>6</sub> -Ni <sub>20</sub>  | n*Fe <sub>13</sub>                           | 9.35                         |
|     | $\sigma$ S <sub>12</sub> -Ni <sub>20</sub> | n*Fe <sub>13</sub>                           | 20.93                        |
|     | $\sigma$ Fe <sub>13</sub> -C <sub>14</sub> | $\sigma^*$ Fe <sub>13</sub> -C <sub>14</sub> | 10.00                        |
|     | $\sigma$ Fe <sub>13</sub> -C <sub>14</sub> | $\sigma^*$ Fe <sub>13</sub> -C <sub>16</sub> | 5.15                         |
|     | $\sigma$ Fe <sub>13</sub> -C <sub>14</sub> | $\sigma^*$ Fe <sub>13</sub> -C <sub>18</sub> | 9.91                         |
|     | $\sigma$ Fe <sub>13</sub> -C <sub>16</sub> | $\sigma^*$ Fe <sub>13</sub> -C <sub>16</sub> | 10.46                        |
|     | $\sigma$ Fe <sub>13</sub> -C <sub>18</sub> | $\sigma^*$ Fe <sub>13</sub> -C <sub>16</sub> | 9.94                         |
|     | $\sigma$ Fe <sub>13</sub> -C <sub>18</sub> | $\sigma^*$ Fe <sub>13</sub> -C <sub>14</sub> | 9.64                         |
|     | $\sigma$ Fe <sub>13</sub> -C <sub>18</sub> | $\sigma^*$ Fe <sub>13</sub> -C <sub>18</sub> | 6.24                         |
|     | n Fe <sub>13</sub>                         | $\sigma^*$ C <sub>18</sub> -O <sub>19</sub>  | 22.26                        |
|     | n Fe <sub>13</sub>                         | $\pi^*$ C <sub>18</sub> -O <sub>19</sub>     | 24.83                        |
|     | n Ni <sub>20</sub>                         | n*Fe <sub>13</sub>                           | 7.17                         |
|     | n Ni <sub>20</sub>                         | $\sigma^*$ S <sub>12</sub> -Ni <sub>20</sub> | 9.64                         |

|     |                                     |                                     |        |
|-----|-------------------------------------|-------------------------------------|--------|
|     | n Ni <sub>20</sub>                  | σ*H <sub>41</sub> -H <sub>42</sub>  | 10.46  |
|     | σ H <sub>41</sub> -H <sub>42</sub>  | n*Ni <sub>20</sub>                  | 93.90  |
|     | n Ni <sub>20</sub>                  | σ*H <sub>41</sub> -H <sub>42</sub>  | 0.06   |
|     | n Ni <sub>20</sub>                  | σ*H <sub>41</sub> -H <sub>42</sub>  | 10.46  |
|     | n Ni <sub>20</sub>                  | σ*H <sub>41</sub> -H <sub>42</sub>  | 0.14   |
| 4LS | σ Fe <sub>13</sub> -C <sub>14</sub> | σ*Fe <sub>13</sub> -C <sub>18</sub> | 10.30  |
|     | σ Fe <sub>13</sub> -C <sub>16</sub> | σ*Fe <sub>13</sub> -C <sub>16</sub> | 11.89  |
|     | σ Fe <sub>13</sub> -C <sub>16</sub> | σ*Fe <sub>13</sub> -C <sub>18</sub> | 10.26  |
|     | σ Fe <sub>13</sub> -C <sub>16</sub> | π*C <sub>18</sub> -O <sub>19</sub>  | 5.11   |
|     | σ Fe <sub>13</sub> -C <sub>18</sub> | σ*Fe <sub>13</sub> -C <sub>14</sub> | 10.67  |
|     | σ Fe <sub>13</sub> -C <sub>18</sub> | σ*Fe <sub>13</sub> -C <sub>16</sub> | 10.67  |
|     | n Fe <sub>13</sub>                  | π*C <sub>14</sub> -N <sub>15</sub>  | 5.46   |
|     | n Fe <sub>13</sub>                  | σ*C <sub>18</sub> -O <sub>19</sub>  | 15.27  |
|     | n Fe <sub>13</sub>                  | π*C <sub>18</sub> -O <sub>19</sub>  | 13.66  |
|     | σ Fe <sub>13</sub> -C <sub>16</sub> | σ*H <sub>43</sub> -H <sub>44</sub>  | 5.41   |
|     | σ H <sub>41</sub> -H <sub>42</sub>  | n*Ni <sub>20</sub>                  | 73.51  |
|     | σ H <sub>41</sub> -H <sub>42</sub>  | σ*S <sub>3</sub> -Ni <sub>20</sub>  | 5.15   |
|     | σ H <sub>43</sub> -H <sub>44</sub>  | n*Fe <sub>13</sub>                  | 132.19 |
|     | n Ni <sub>20</sub>                  | σ*H <sub>43</sub> -H <sub>44</sub>  | 0.68   |
|     | n Ni <sub>20</sub>                  | σ*H <sub>41</sub> -H <sub>42</sub>  | 10.12  |
|     | n Fe <sub>13</sub>                  | σ*H <sub>43</sub> -H <sub>44</sub>  | 1.69   |
|     | n Fe <sub>13</sub>                  | σ*H <sub>43</sub> -H <sub>44</sub>  | 0.83   |
|     | n Fe <sub>13</sub>                  | σ*H <sub>43</sub> -H <sub>44</sub>  | 0.08   |
|     | σ C <sub>16</sub> -N <sub>17</sub>  | σ*H <sub>43</sub> -H <sub>44</sub>  | 0.20   |
|     | π C <sub>16</sub> -N <sub>17</sub>  | σ* H <sub>43</sub> -H <sub>44</sub> | 0.29   |
|     | π C <sub>16</sub> -N <sub>17</sub>  | σ* H <sub>43</sub> -H <sub>44</sub> | 0.12   |
|     | n Ni <sub>20</sub>                  | σ*H <sub>43</sub> -H <sub>44</sub>  | 0.19   |

Table.4. Results of the atomic integrations carried out on all the atoms of 1LS state (a.u) at B3LYP/6-311++G with (2d, 2p) polarizations on all atoms.

| ILS | ENERGY           | CHARGE         | $\rho(r)$   | $-\nabla^2\rho(r)$ | VOLUME @0.01    | VOLUME @0.001 |
|-----|------------------|----------------|-------------|--------------------|-----------------|---------------|
| C16 | -3.7536e+001     | 6.1800e-001    | 5.3819e+0   | -9.1037e-003       | 8.8245e+001     | 7.7508e+001   |
| N17 | -5.5181e+001     | -1.2651e+000   | 8.2651e+0   | -1.0024e-003       | 1.7902e+002     | 1.3901e+002   |
|     | <b>-92.7187</b>  | <b>-0.6471</b> |             |                    | <b>267.2662</b> |               |
| C14 | -3.7536e+001     | 6.1265e-001    | 5.3873e+0   | -9.7590e-003       | 9.0247e+001     | 7.8414e+001   |
| N15 | -5.5181e+001     | -1.2679e+0     | 8.2679e+0   | -1.1514e-003       | 1.8024e+002     | 1.3898e+002   |
|     | <b>-92.7178</b>  | <b>-0.6552</b> |             |                    | <b>270.50</b>   |               |
| C18 | -3.7380e+001     | 9.6097e-001    | 5.0390e+0   | -9.9651e-003       | 7.1879e+001     | 6.3968e+001   |
| O19 | -7.5933e+001     | -1.1647e+000   | 9.1647e+0   | -3.2310e-003       | 1.3376e+002     | 1.0804e+002   |
|     | <b>-113.3143</b> | <b>-0.2037</b> |             |                    | <b>205.64</b>   |               |
| S12 | -3.9839e+002     | -3.4582e-001   | 1.6345e+1   | 7.3714e-003        | 1.7613e+002     | 1.5817e+002   |
| C11 | -3.7894e+001     | -4.2542e-003   | 6.0042e+000 | -8.3156e-003       | 6.1173e+001     | 5.8117e+001   |
| C10 | -3.7845e+001     | 1.2319e-001    | 5.8768e+000 | -8.3350e-003       | 6.7683e+001     | 6.0736e+001   |
| H30 | -6.3810e-001     | -4.8792e-002   | 1.0487e+000 | 5.8045e-004        | 5.3902e+001     | 4.0679e+001   |
| H31 | -6.3569e-001     | -4.4866e-002   | 1.0448e+000 | 2.8503e-004        | 5.4154e+001     | 4.0340e+001   |
| H32 | -6.2821e-001     | -1.8834e-002   | 1.0188e+000 | 4.4902e-004        | 5.4592e+001     | 4.0488e+001   |
| H39 | -6.2336e-001     | 1.4327e-002    | 9.8567e-001 | 5.1011e-004        | 4.7686e+001     | 3.7786e+001   |
| H40 | -6.2781e-001     | 1.5361e-002    | 9.8463e-001 | -1.4061e-004       | 4.5825e+001     | 3.8222e+001   |
|     | <b>-477.2901</b> | <b>-0.3096</b> |             |                    | <b>561.15</b>   |               |
| S6  | -3.9837e+002     | -3.6754e-001   | 1.6367e+001 | 8.4470e-003        | 1.7981e+002     | 1.5968e+002   |
| C5  | -3.7899e+001     | -2.1994e-002   | 6.0219e+000 | 1.1678e-003        | 6.1290e+001     | 5.8165e+001   |
| C4  | -3.7898e+001     | 5.5278e-002    | 5.9447e+000 | 1.7917e-003        | 6.8576e+001     | 6.1560e+001   |
| H27 | -6.4134e-001     | -6.0088e-002   | 1.0600e+000 | 8.8778e-004        | 5.4542e+001     | 4.0733e+001   |
| H28 | -6.1920e-001     | 3.8665e-003    | 9.9613e-001 | -5.8473e-005       | 5.1640e+001     | 4.0353e+001   |
| H29 | -6.3784e-001     | -4.6601e-002   | 1.0466e+000 | 4.7762e-004        | 5.4258e+001     | 4.0438e+001   |
| H37 | -6.2898e-001     | 2.4515e-003    | 9.9754e-001 | 7.7038e-004        | 4.9179e+001     | 3.8240e+001   |
| H38 | -6.2462e-001     | 1.3678e-002    | 9.8632e-001 | 2.0959e-004        | 4.8945e+001     | 3.7912e+001   |
|     | <b>-477.3253</b> | <b>-0.4209</b> |             |                    | <b>568.25</b>   |               |
| S9  | -3.9830e+002     | -4.4728e-001   | 1.6447e+001 | 7.7608e-003        | 2.3846e+002     | 1.9414e+002   |
| C7  | -3.7872e+001     | 1.0153e-001    | 5.8984e+000 | -8.0623e-003       | 6.7076e+001     | 6.0334e+001   |
| C8  | -3.7853e+001     | 3.1195e-002    | 5.9688e+000 | -6.5341e-003       | 6.1897e+001     | 5.8025e+001   |
| H21 | -6.3550e-001     | -4.2655e-002   | 1.0426e+000 | 5.3394e-004        | 5.4689e+001     | 4.0378e+001   |
| H22 | -6.3736e-001     | -4.7279e-002   | 1.0472e+000 | 5.0596e-004        | 5.4913e+001     | 4.0617e+001   |
| H23 | -6.3811e-001     | -5.3547e-002   | 1.0535e+000 | 3.3103e-004        | 5.4417e+001     | 4.0366e+001   |
| H35 | -6.4157e-001     | -2.8814e-002   | 1.0288e+000 | 8.0251e-004        | 5.1434e+001     | 3.8974e+001   |
| H36 | -6.3553e-001     | -1.5332e-002   | 1.0153e+000 | -2.5600e-004       | 5.0335e+001     | 3.9415e+001   |
|     | <b>-477.2186</b> | <b>-0.5021</b> |             |                    | <b>633.22</b>   |               |
| S3  | -3.9832e+002     | -4.4518e-001   | 1.6445e+001 | -3.1898e-003       | 2.3285e+002     | 1.9121e+002   |
| C2  | -3.7839e+001     | 3.6651e-002    | 5.9633e+000 | -3.1537e-003       | 5.9268e+001     | 5.6314e+001   |
| C1  | -3.7870e+001     | 6.2530e-002    | 5.9374e+000 | -9.1454e-003       | 6.8288e+001     | 6.1396e+001   |
| H24 | -6.2944e-001     | -3.1592e-002   | 1.0315e+000 | -5.2412e-004       | 5.3885e+001     | 4.0148e+001   |
| H25 | -6.3498e-001     | -3.9422e-002   | 1.0394e+000 | 7.4187e-004        | 5.3876e+001     | 4.0589e+001   |
| H26 | -6.4348e-001     | -7.1825e-002   | 1.0718e+000 | 6.3313e-004        | 5.5710e+001     | 4.1790e+001   |
| H34 | -6.3190e-001     | -2.1667e-003   | 1.0021e+000 | 6.9590e-004        | 4.7155e+001     | 3.8033e+001   |
| H33 | -6.3555e-001     | -9.8434e-003   | 1.0098e+000 | 5.9303e-004        | 4.9852e+001     | 3.9578e+001   |
|     | <b>-477.2130</b> | <b>-0.5008</b> |             |                    | <b>620.90</b>   |               |
| Fe  | -1.2641e+003     | 9.0725e-001    | 2.5092e+001 | -4.0083e-004       | 7.5513e+001     | 7.2631e+001   |
| Ni  | -1.5091e+003     | 5.5632e-001    | 2.7443e+001 | -8.5709e-003       | 1.1095e+002     | 1.0071e+002   |

Table5. Results of the atomic integrations carried out on all the atoms of 3LS state B3LYP/6-311++G with (2d, 2p) polarizations on all atoms.

|     | ENERGY (a.u) | CHARGE(q)( in a.u) | $\rho(r)$ in (a.u) | $-\nabla^2\rho(r)$ |
|-----|--------------|--------------------|--------------------|--------------------|
| C16 | -3.7539e+1   | 6.1656e-001        | 5.3834e+000        | -9.0908e-005       |
| N17 | -5.5235e+1   | -1.3277e+000       | 8.3277e+000        | -7.9045e-005       |
|     |              |                    |                    |                    |
| C14 | -3.7539e+001 | 6.2213e-001        | 5.3778e+000        | 1.6244e-004        |
| N15 | -5.5234e+001 | -1.3227e+000       | 8.3227e+000        | -2.8524e-004       |
|     |              |                    |                    |                    |
| C18 | -3.7389e+001 | 9.5552e-001        | 5.0444e+000        | -1.4572e-004       |
| O19 | -7.5882e+001 | -1.1786e+000       | 9.1786e+000        | 1.0077e-003        |
|     |              |                    |                    |                    |
| S12 | -3.9839e+002 | -3.6083e-001       | 1.6360e+001        | 2.4316e-003        |
| C11 | -3.7919e+001 | -3.84885e-002      | 6.0384e+000        | 6.7247e-004        |
| C10 | -3.7889e+001 | 6.1922e-002        | 5.9380e+000        | 7.8677e-004        |
| H30 | -6.3821e-001 | -5.2921e-002       | 1.0529e+000        | 2.7411e-004        |
| H31 | -6.3556e-001 | -4.6274e-002       | 1.0462e+000        | 1.7442e-005        |
| H32 | -6.2723e-001 | -1.7674e-002       | 1.0176e+000        | 2.6465e-004        |
| H39 | -6.2301e-001 | 1.5441e-002        | 9.8455e-001        | 1.3763e-004        |
| H40 | -6.2579e-001 | 1.7384e-002        | 9.8261e-001        | 1.2409e-004        |
|     |              |                    |                    |                    |
| S6  | -3.9838e+002 | -3.4468e-001       | 1.6344e+001        | 2.5413e-003        |
| C5  | -3.7906e+001 | -2.6682e-002       | 6.0266e+000        | 1.7169e-004        |
| C4  | -3.7896e+001 | 5.8883e-002        | 5.9411e+000        | 5.5970e-004        |
| H27 | -6.3939e-001 | -5.7688e-002       | 1.0576e+000        | 2.1420e-004        |
| H28 | -6.1900e-001 | 2.7920e-003        | 9.9720e-001        | 1.8562e-004        |
| H29 | -6.3505e-001 | -4.0863e-002       | 1.0408e+000        | 2.5947e-004        |
| H37 | -6.2857e-001 | 5.1172e-004        | 9.9948e-001        | 3.0610e-004        |
| H38 | -6.2346e-001 | 1.7181e-002        | 9.8281e-001        | 1.7851e-004        |
|     |              |                    |                    |                    |
| S9  | -3.9832e+002 | 1.5441e-002        | 9.8455e-001        | 1.3763e-004        |
| C7  | -3.7901e+001 | 6.5881e-002        | 5.9341e+000        | 1.9558e-004        |
| C8  | -3.7903e+001 | -2.9288e-002       | 6.0292e+000        | 4.3756e-004        |
| H21 | -6.3358e-001 | -3.7388e-002       | 1.0373e+000        | 2.6959e-004        |
| H22 | -6.3552e-001 | -4.3670e-002       | 1.0436e+000        | 2.7737e-004        |
| H23 | -6.3816e-001 | -5.2812e-002       | 1.0528e+000        | 2.3600e-004        |
| H35 | -6.4032e-001 | -3.0791e-002       | 1.0307e+000        | 1.7770e-004        |
| H36 | -6.2946e-001 | 4.0570e-004        | 9.9959e-001        | 2.0074e-004        |
|     |              |                    |                    |                    |
| S3  | -3.9833e+002 | -4.2442e-001       | 1.6424e+001        | 2.9099e-003        |
| C2  | -3.7886e+001 | -2.1367e-002       | 6.0213e+000        | 8.0529e-004        |
| C1  | -3.7879e+001 | 5.5072e-002        | 5.9449e+000        | 1.4485e-004        |
| H24 | -6.3478e-001 | -4.2594e-002       | 1.0425e+000        | 3.2959e-004        |
| H25 | -6.3422e-001 | -4.0809e-002       | 1.0408e+000        | 3.0639e-004        |
| H26 | -6.4086e-001 | -6.5252e-002       | 1.0652e+000        | 3.4688e-004        |
| H34 | -6.3009e-001 | 1.3577e-004        | 9.9986e-001        | 2.0186e-004        |
| H33 | -6.3302e-001 | -3.8334e-003       | 1.0038e+000        | 2.0727e-004        |
|     |              |                    |                    |                    |
| Fe  | -1.2641e+003 | 8.9313e-001        | 2.5106e+001        | -2.9376e-003       |
|     |              |                    |                    |                    |
| Ni  | -1.5090e+003 | 5.6176e-001        | 2.7438e+001        | -1.2633e-003       |
|     |              |                    |                    |                    |
| H41 | -5.7905e-001 | -1.3858e-002       | 1.0138e+000        | 1.5455e-004        |
| H42 | -5.9019e-001 | -1.8419e-002       | 1.0184e+000        | 1.9501e-004        |
|     |              |                    |                    |                    |



Table.6 Results of the atomic integrations carried out on all the atoms of 2LS state B3LYP/6-311++G with (2d, 2p) polarizations on all atoms.

|          | Energy (a.u)  | Charge(q in a.u) | $\rho(r)$ in a.u | $-\nabla^2\rho(r)$ |
|----------|---------------|------------------|------------------|--------------------|
| C16      | -3.7536e+001  | 6.2835e-001      | 5.3716e+000      | -1.9221e-004       |
| N17      | -5.5238e+001  | -3.284e+000      | 8.3284e+000      | -2.0154e-004       |
|          | -92.7753      |                  |                  |                    |
| C14      | -3.7536e+001  | 6.2044e-001      | 5.3795e+000      | -1.1654e-004       |
| N15      | -5.5232e+001  | -1.3192e+000     | 8.3192e+000      | -6.3873e-005       |
|          | -92.7686      |                  |                  |                    |
| C18      | -3.7364e+001  | 1.0069e+000      | 4.9930e+000      | -1.9567e-004       |
| O19      | -7.5905e+001  | -1.1683e+000     | 9.1683e+000      | 9.5673e-004        |
|          | -113.2708     |                  |                  |                    |
| S12 brdg | -3.9840e+002  | -3.8426e-001     | 1.6384e+001      | 2.2916e-003        |
| C11      | -3.7915e+001  | -3.8062e-002     | 6.0380e+000      | 5.9230e-004        |
| C10      | -3.7888e+001  | 6.5252e-002      | 5.9347e+000      | 1.3195e-003        |
| H30      | -6.3810e-001  | -5.1472e-002     | 1.0514e+000      | 3.1064e-004        |
| H31      | -6.3447e-001  | -4.1704e-002     | 1.0417e+000      | 2.1869e-004        |
| H32      | -6.2712e-001  | -1.7415e-002     | 1.0174e+000      | 2.1593e-004        |
| H39      | -6.2480e-001  | 7.0523e-003      | 9.9294e-001      | 1.7348e-004        |
| H40      | -6.3107e-001  | 5.7833e-003      | 9.9421e-001      | 2.6930e-004        |
|          | -477.3688     |                  |                  |                    |
| S6 brdg  | -3.9836e+002  | -3.6345e-001     | 1.6363e+001      | 2.9615e-003        |
| C5       | -3.7857e+001  | 3.2970e-002      | 5.9670e+000      | -6.1376e-003       |
| C4       | -3.7897e+001  | 5.7140e-002      | 5.9428e+000      | 7.1261e-004        |
| H27      | -6.3920e-001  | -5.7212e-002     | 1.0572e+000      | 2.2841e-004        |
| H28      | -6.1688e-001  | 8.3496e-003      | 9.9165e-001      | 2.7286e-004        |
| H29      | -6.3357e-001  | -3.7505e-002     | 1.0375e+000      | 2.4001e-004        |
| H37      | -6.2046e-001  | 2.2070e-002      | 9.7792e-001      | 2.7156e-004        |
| H38      | -6.3110e-001  | -8.0772e-003     | 1.0080e+000      | 2.0820e-004        |
|          | -477.2653     |                  |                  |                    |
| S9       | -3.9830e+002  | -4.6874e-001     | 1.6468e+001      | 1.7997e-003        |
| C7       | -3.7902e+001  | 6.6807e-002      | 5.9331e+000      | -8.7084e-004       |
| C8       | -3.7887e+001  | -2.1007e-002     | 6.0210e+000      | 1.0727e-003        |
| H21      | -6.32783e-001 | -3.7072e-002     | 1.0370e+000      | 2.7689e-004        |
| H22      | -6.3486e-001  | -4.2753e-002     | 1.0427e+000      | 2.9411e-004        |
| H23      | -6.3952e-001  | -5.8348e-002     | 1.0583e+000      | 2.9494e-005        |
| H35      | -6.4286e-001  | -3.7186e-002     | 1.0371e+000      | 1.7094e-004        |
| H36      | -6.3851e-001  | -2.3578e-002     | 1.0235e+000      | 2.1779e-004        |
|          | -477.2864     |                  |                  |                    |
| S3       | -3.9834e+002  | -4.4165e-001     | 1.6441e+001      | 2.1221e-003        |
| C2       | -3.7881e+001  | -2.2395e-002     | 6.0223e+000      | -3.0771e-005       |
| C1       | -3.7879e+001  | 5.6383e-002      | 5.9436e+000      | -1.4627e-004       |
| H24      | -6.3390e-001  | -3.8648e-002     | 1.0386e+000      | 2.9839e-004        |
| H25      | -6.3370e-001  | -3.7838e-002     | 1.0378e+000      | 2.3634e-004        |
| H26      | -6.4067e-001  | -6.5309e-002     | 1.0653e+000      | 3.4697e-004        |
| H34      | -6.2859e-001  | 5.3181e-003      | 9.9468e-001      | 2.0631e-004        |
| H33      | -6.3268e-001  | -3.6944e-003     | 1.0036e+000      | 1.8816e-004        |
|          | -477.2784     |                  |                  |                    |
| Fe       | -1.2641e+003  | 9.0899e-001      | 2.5091e+001      | -5.6179e-005       |
|          |               |                  |                  |                    |
| Ni20     | -1.5091e+003  | 5.7344e-001      | 2.7426e+001      | -1.3468e-003       |
|          |               |                  |                  |                    |
| H41      | -5.8461e-001  | 2.6558e-002      | 9.7344e-001      | 2.2065e-004        |
| H42      | -5.9630e-001  | -1.5313e-002     | 1.0153e+000      | 1.6993e-004        |
|          | -1.1809       |                  |                  |                    |



Table.7 Results of the atomic integrations carried out over all the atoms of 4LS state B3LYP/6-311++G with (2d, 2p) polarizations on all atoms.

|          | Energy(a.u)   | Charge(q in a.u) | $\rho(r)$ in a.u | $-\nabla^2\rho(r)$ |
|----------|---------------|------------------|------------------|--------------------|
| C16      | -3.7536e+001  | 6.1674e-001      | 5.3832e+000      | -7.6890e-003       |
| N17      | -5.5221e+001  | -1.3165e+0       | 8.3165e+0        | -1.4037e-003       |
|          |               |                  |                  |                    |
| C14      | -3.7530e+001  | 6.3707e-001      | 5.3629e+000      | -7.7785e-003       |
| N15      | -5.5206e+001  | -1.2883e+000     | 8.2883e+000      | -3.5253e-005       |
|          |               |                  |                  |                    |
| C18      | -3.7351e+001  | 1.0130e+000      | 4.9869e+000      | -8.9518e-003       |
| O19      | -7.5888e+001  | -1.1465e+000     | 9.1465e+000      | -2.2240e-003       |
|          |               |                  |                  |                    |
| S12_brdg | -3.9840e+002  | -3.3530e-001     | 1.6335e+001      | 4.1121e-003        |
| C11      | -3.7889e+001  | -3.0361e-004     | 6.0003e+000      | -4.9672e-003       |
| C10      | -3.7844e+001  | 1.3223e-001      | 5.8677e+000      | -6.1391e-003       |
| H30      | -6.4221e-001  | -5.8754e-002     | 1.0587e+000      | 7.3912e-004        |
| H31      | -6.3360e-001  | -3.6759e-002     | 1.0367e+000      | 2.1105e-004        |
| H32      | -6.2674e-001  | -1.6737e-002     | 1.0167e+000      | 3.9122e-004        |
| H39      | -6.1829e-001  | 2.1798e-002      | 9.7820e-001      | -1.3147e-003       |
| H40      | -6.2479e-001  | 1.33915e-002     | 9.8660e-001      | -1.3461e-003       |
|          |               |                  |                  |                    |
| S6_brdg  | -3.9837e+002  | -3.3754e-001     | 1.6337e+001      | 4.0039e-003        |
| C5       | -3.7864e+001  | 2.7071e-002      | 5.9729e+000      | -5.2519e-003       |
| C4       | -3.7894e+001  | 6.1983e-002      | 5.9380e+000      | -1.1791e-003       |
| H27      | -6.4549e-001  | -6.7415e-002     | 1.0674e+000      | 8.1565e-004        |
| H28      | -6.1977e-001  | 1.0950e-003      | 9.9890-001       | -6.3854e-005       |
| H29      | -6.3427e-001  | -3.4076e-002     | 1.0340e+000      | 6.0816e-004        |
| H37      | -6.1881e-001  | 2.4588e-002      | 9.7541e-001      | -1.6763e-004       |
| H38      | -6.3309e-001  | -1.6215e-002     | 1.0162e+000      | -3.6465e-004       |
|          |               |                  |                  |                    |
| S9       | -3.9833e+002  | -3.9921e-001     | 1.6399e+001      | 3.7372e-003        |
| C7       | -3.7854e+001  | 1.4262e-001      | 5.8573e+000      | -2.3069e-003       |
| C8       | -3.7863e+001  | 3.6656e-002      | 5.9633e+000      | -6.7299e-003       |
| H21      | -6.3342e-001  | -3.4397e-002     | 1.0343e+000      | 6.2475e-004        |
| H22      | -6.3671e-001  | -4.2979e-002     | 1.0429e+000      | 9.7836e-004        |
| H23      | -6.4317e-001  | -6.2975e-002     | 1.0629e+000      | 3.7863e-004        |
| H35      | -6.4614e-001  | -4.5279e-002     | 1.0452e+000      | 7.3319e-004        |
| H36      | -6.3902e-001  | -2.7305e-002     | 1.0273e+000      | 2.1068e-004        |
|          |               |                  |                  |                    |
| S3       | -3.9831e+002  | -5.3192e-001     | 1.6531e+001      | -1.6467e-003       |
| C2       | -3.7852e+001  | 2.8199e-002      | 5.9718e+000      | -4.9907e-003       |
| C1       | -3.7830e+001  | 1.3774e-001      | 5.8622e+000      | -3.2860e-003       |
| H24      | -6.3703e-001  | -4.3202e-002     | 1.0432e+000      | 8.4822e-004        |
| H25      | -6.3573e-001  | -4.3293e-002     | 1.0432e+000      | 7.3804e-004        |
| H26      | -6.4930e-001  | -8.2177e-002     | 1.0821e+000      | 6.2367e-004        |
| H34      | -6.3546e-001  | -5.3485e-003     | 1.0053e+000      | 2.5154e-004        |
| H33      | -6.36800e-001 | -8.5319e-003     | 1.0085e+000      | 1.5030e-005        |
|          |               |                  |                  |                    |
| Fe       | -1.2640e+003  | 9.0675e-001      | 2.5093e+001      | -3.6933e-003       |
|          |               |                  |                  |                    |
| Ni       | -1.5090e+003  | 5.7239e-001      | 2.7427e+001      | -2.1234e-003       |
|          |               |                  |                  |                    |
| H41      | -6.0071e-001  | -4.4204e-002     | 1.0442e+000      | -2.2405e-005       |
| H42      | -5.7409e-001  | 1.5119e-002      | 9.8488e-001      | 1.8152e-004        |
|          |               |                  |                  |                    |
| H43(Fe)  | -5.9607e-001  | -1.0975e-002     | 1.0109e+000      | 1.7408e-004        |
| H44(Fe)  | -5.8848e-001  | 2.1251e-002      | 9.7874e-001      | 2.1160e-004        |

Table.8 H-H *bcp* properties computed at B3LYP/6-31g(f) for Fe,6-311g++(2d,2p) for Ni and 6-31g(d) on all other atoms

| System   | Ellipticity | $\rho(r)$ in a.u | G(r)        | $-\nabla^2\rho(r)$ | V(r)        |
|----------|-------------|------------------|-------------|--------------------|-------------|
| 2HS      | 3.0984e-002 | 2.2566e-001      | 1.0555e-002 | 1.9773e-001        | 2.1884e-001 |
| 2HSp     | 5.8201e-002 | 5.9924e-002      | 4.7541e-002 | -3.2206e-002       | 6.2876e-002 |
| 2LS      | 2.8263e-002 | 2.2650e-001      | 9.9426e-003 | 2.0130e-001        | 2.2118e-001 |
| 2LSp     | 3.1664e-002 | 2.2557e-001      | 1.0237e-002 | 1.9799e-001        | 2.1846e-001 |
| 3LS      | 3.0226e-002 | 2.1055e-001      | 1.5097e-002 | 1.6410e-001        | 1.9429e-001 |
| 3LSp     | 2.5754e-002 | 2.2153e-001      | 9.2918e-003 | 1.9394e-001        | 2.1252e-001 |
| 4LS(Ni)  | 1.9344e-002 | 2.2358e-001      | 1.1267e-002 | 1.9716e-001        | 2.1970e-001 |
| 4LS(Fe)  | 2.8469e-002 | 2.2740e-001      | 9.9225e-003 | 2.0273e-001        | 2.2257e-001 |
| 4LSp(Fe) | 2.8867e-002 | 2.2731e-001      | 9.6609e-003 | 2.0296e-001        | 2.2228e-001 |
| 4LSp(Ni) | 2.3267e-00  | 2.2412e-001      | 9.5373e-003 | 1.9933e-001        | 2.1841e-001 |

Table.9 Topological properties at the *bcps* between Fe & CN

| Fe-C     | Ellipticity | $\rho(r)$ (a.u) | G(r)        | K(r)        | $-\nabla^2\rho(r)$ | V(r)        |
|----------|-------------|-----------------|-------------|-------------|--------------------|-------------|
| 2HS      | 1.1235e-001 | 1.1776e-001     | 1.2498e-001 | 4.0002e-002 | -8.4980e-002       | 1.6498e-001 |
| 2HSp     | 8.2613e-002 | 1.2261e-001     | 1.2669e-001 | 4.4643e-002 | -8.2050e-002       | 1.7133e-001 |
| 2LS      | 1.4221e-001 | 1.1744e-001     | 1.2354e-001 | 3.9769e-002 | -8.3771e-002       | 1.6331e-001 |
| 2LSp     | 8.4798e-002 | 1.2218e-001     | 1.2645e-001 | 4.4234e-002 | -8.2222e-002       | 1.7069e-001 |
| 3LS      | 4.3700e-002 | 1.1276e-001     | 1.2244e-001 | 3.7411e-002 | -8.5029e-002       | 1.5985e-001 |
| 3LSp     | 4.3700e-002 | 1.1276e-001     | 1.2244e-001 | 3.7411e-002 | -8.5029e-002       | 1.5985e-001 |
| 4LS(Ni)  | 5.7303e-002 | 1.1364e-001     | 1.2289e-001 | 3.8071e-002 | -8.4820e-002       | 1.6096e-001 |
| 4LS(Fe)  | 5.5810e-002 | 1.1516e-001     | 1.1948e-001 | 3.9506e-002 | -7.9979e-002       | 1.5899e-001 |
| 4LSp(Fe) | 8.0862e-002 | 1.1487e-001     | 1.2285e-001 | 3.8779e-002 | -8.4072e-002       | 1.6163e-001 |
| 4LSp(Ni) | 1.0061e-001 | 1.2103e-001     | 1.2533e-001 | 4.3354e-002 | -8.1978e-002       | 1.6868e-001 |
| 2HS      | 3.3739e-002 | 1.1497e-001     | 1.2543e-001 | 3.8884e-002 | -8.6545e-002       | 1.6431e-001 |
| 2HSp     | 3.6236e-002 | 1.1602e-001     | 1.2280e-001 | 3.9907e-002 | -8.2893e-002       | 1.6270e-001 |

Table.10 Topological properties at the *bcps* between C & N in proximal CN group

| C-N  | Ellipticity | Rho(r) (a.u) | G(r) (a.u)  | K(r) (a.u)  | $-\nabla^2\rho(r)$ (a.u) | V(r) (a.u) |
|------|-------------|--------------|-------------|-------------|--------------------------|------------|
| 1hs  | 2.6605e-003 | 4.6170e-001  | 7.0857e-001 | 8.1346e-001 | 1.0489e-001              | 1.5220e    |
| 1hsp | 5.9265e-003 | 4.7556e-001  | 7.1331e-001 | 8.8273e-001 | 1.6942e-001              | 1.5960     |
| 1ls  | 1.9167e-003 | 4.6870e-001  | 7.3648e-001 | 8.3223e-001 | 9.5752e-002              | 1.5687     |
| 1lsp | 6.3157e-003 | 4.7525e-001  | 7.1170e-001 | 8.8185e-001 | 1.7014e-001              | 1.5935     |
| 2hs  | 8.5102e-004 | 4.7544e-001  | 7.0774e-001 | 8.8280e-001 | 1.7506e-001              | 1.5905     |
| 2hsp | 8.5102e-004 | 4.7544e-001  | 7.0774e-001 | 8.8280e-001 | 1.7506e-001              | 1.5905     |
| 2ls  | 1.2077e-003 | 4.7543e-001  | 7.0690e-001 | 8.8265e-001 | 1.7574e-001              | 1.5895     |
| 2lsp | 2.5593e-004 | 4.7455e-001  | 7.1495e-001 | 8.8044e-001 | 1.6548e-001              | 1.5954     |
| 3ls  | 5.5695e-003 | 4.7446e-001  | 7.0038e-001 | 8.7963e-001 | 1.7924e-001              | 1.5800     |
| 3lsp | 7.5575e-003 | 4.7512e-001  | 7.0924e-001 | 8.8135e-001 | 1.7211e-001              | 1.5905     |
| 4ls  | 1.4147e-003 | 4.7719e-001  | 7.1305e-001 | 8.8773e-001 | 1.7468e-001              | 1.6007     |
| 4lsp | 9.2965e-004 | 4.7640e-001  | 7.1833e-001 | 8.8556e-001 | 1.6723e-001              | 1.6039     |

Table.11 Natural spin densities at the triplet cases computed at B3LYP/6-311++G (d, p) level.

|                                               | 1HS                       | 1HSp                      | 2HS                       | 2HSp                      |
|-----------------------------------------------|---------------------------|---------------------------|---------------------------|---------------------------|
| Fe                                            | 0.005                     | 0.181                     | 0.111                     | -0.009                    |
| Ni                                            | 1.399                     | -0.003                    | -0.001                    | 1.416                     |
| S                                             | 0.103                     | -0.005                    | 0.249                     | 0.097                     |
| S                                             | 0.144                     | -0.007                    | 0.097                     | 0.249                     |
| S                                             | 0.079                     | 0.000                     | 0.121                     | 0.121                     |
| S                                             | 0.245                     | -0.009                    | 0.111                     | 0.111                     |
| Total<br>Spin density                         | 2.000                     | 2.000                     | 2.00                      | 2.000                     |
| Spin contamination<br><s <sup>2</sup> > value | 2.0083                    | 2.0114                    | 2.0094                    | 2.0097                    |
| Spin assigned to Fe                           | $\alpha\beta$             | $\alpha\beta$             | $\alpha\beta$             | $\alpha\beta$             |
| Spin assigned to Ni                           | $\alpha\beta\alpha\alpha$ | $\alpha\beta\alpha\alpha$ | $\alpha\beta\alpha\alpha$ | $\alpha\beta\alpha\alpha$ |
| Net Charge of the complex                     | -2                        | -1                        | -2                        | -1                        |

Table.12 Relative energies of the 12 states and their total charges computed at the B3LYP/6-311++G with (2d, 2p) polarizations on all atoms.

|                                    | 1HS      | 1HSp | 1LS     | 1LSp    | 2HS    | 2HSp   | 2LS    | 2LSp   | 3LS    | 3LSp   | 4LS    | 4LSp   |
|------------------------------------|----------|------|---------|---------|--------|--------|--------|--------|--------|--------|--------|--------|
| <b>CHARGE</b>                      | -2       | -1   | -2      | -1      | -2     | -1     | -2     | -1     | -2     | -1     | -2     | -1     |
| <b>MULTIPLICITY</b>                | 3        | 3    | 1       | 1       | 3      | 3      | 1      | 1      | 1      | 1      | 1      | 1      |
| <b>RELATIVE ENERGY (IN Hatree)</b> | -0.73024 | 0    | -0.7489 | -0.0105 | 0.5772 | 1.1835 | 0.5605 | 0.5541 | 0.5595 | 1.1715 | 1.7235 | 2.3474 |

### Results of the computations carried out at B3LYP/LANL2DZ.

Figure.1 Plot of  $\rho(r)$  at the M-H<sub>2</sub>bcp (represented in black) and at the H-H bcp (represented in red).where  $\rho(r)$  values are in a.u

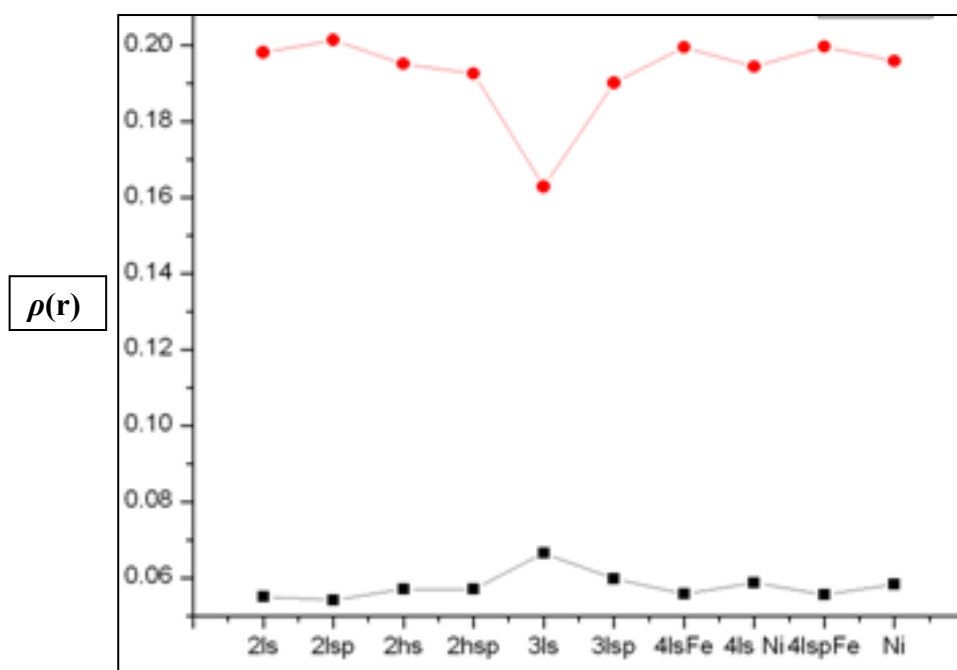

Figure.2 Volume of Ni atom at an isodensity surface of 0.001 a.u ,X-axis is volume of the Ni atom in au<sup>3</sup>

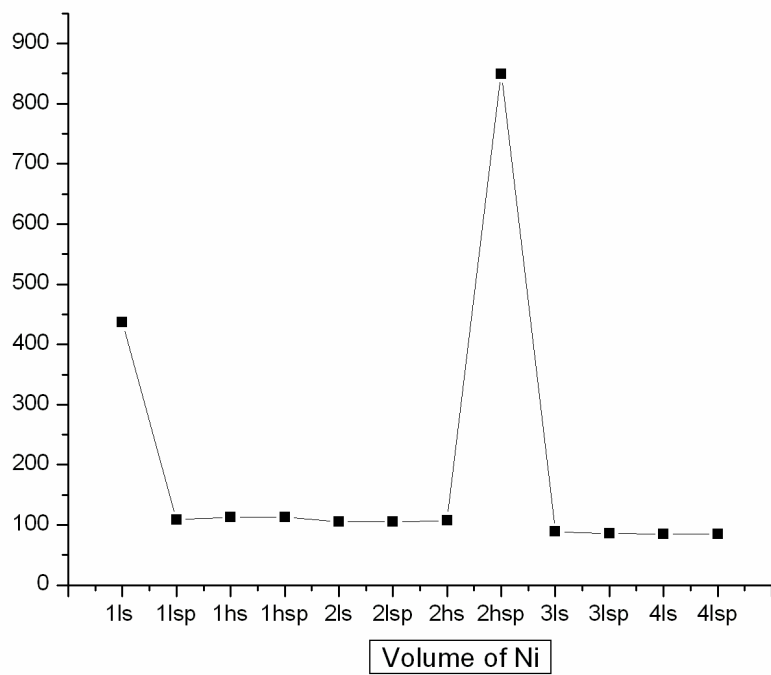

Figure.3 Electron density  $\rho(r)$  at the Fe atom at the various states. X-axis represents  $\rho(r)$  values in  $e\text{\AA}^{-3}$

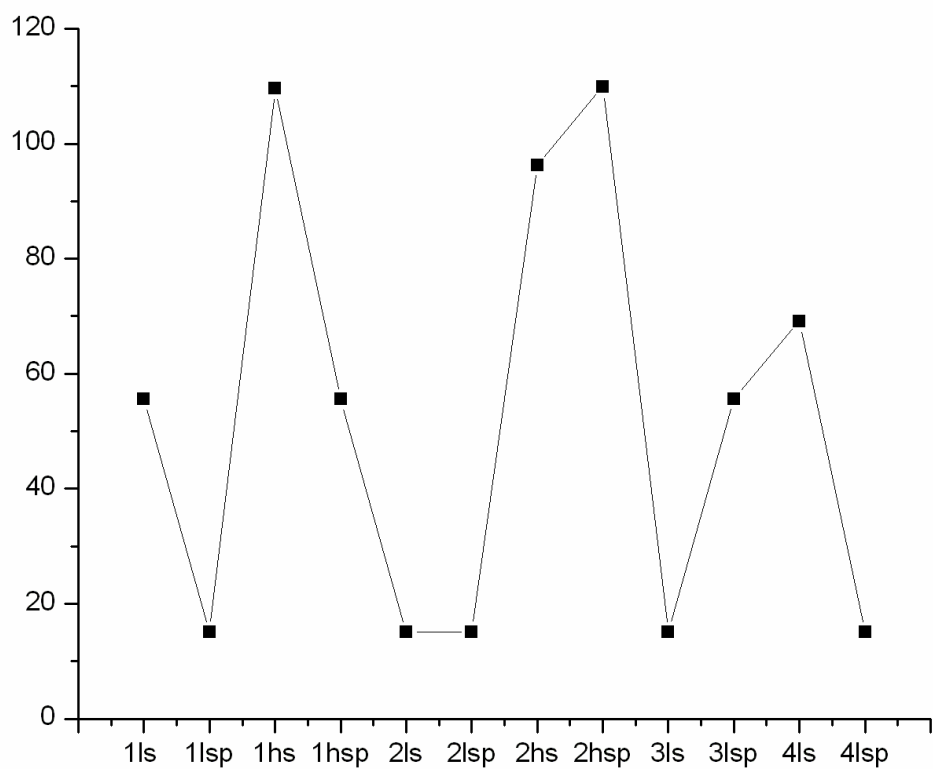



Figure.4 Energy of the atomic basins of Fe in green and Ni in red in the lowspin protonated cases. x-axis represents the energy at the atomic basins  $\Delta E(\Omega)$  in a.u

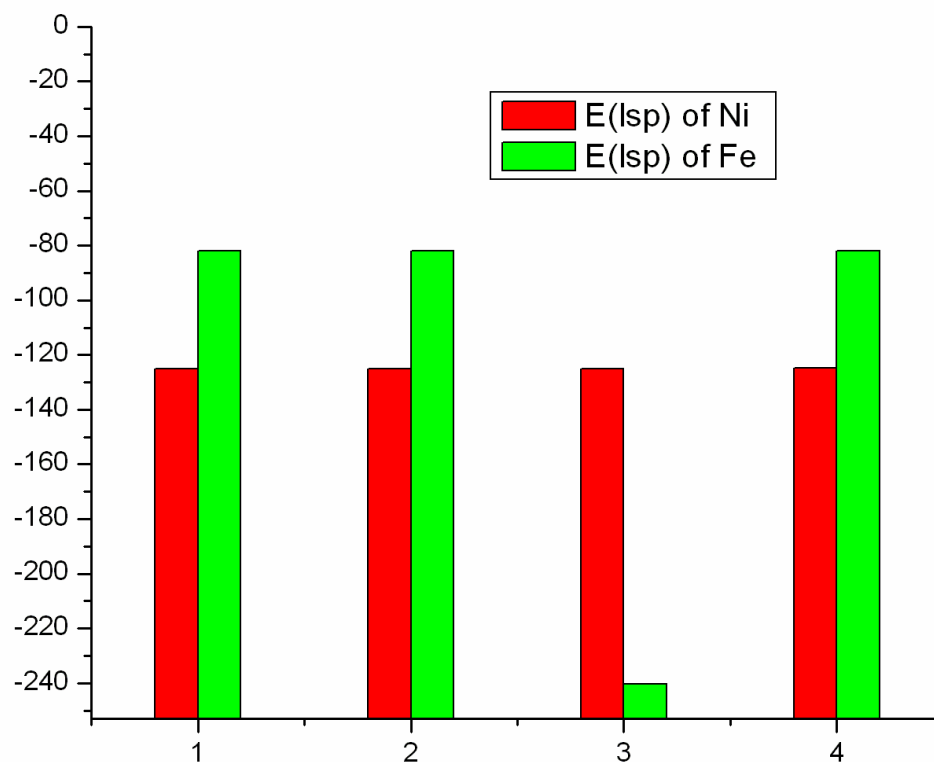

References:

- [88] R. F. W. Bader, *Acc. Chem. Res.* **1985**, *18*, 9-15.
- [89] R. F. W. Bader, *Atoms in Molecules – A Quantum Theory*, Oxford University Press, New York, **1990**.
- [90] R. Bader, *J. Phys. Chem. A* **1998**, *102*, 7314-7323.
- [91] R. F. W. Bader, *Chem. Rev.* **1991**, *91*, 893-928.
